# Supplementary material
Source: ML conference proceedings conference paper supplement (https://proceedings.neurips.cc/paper_files/paper/2019/hash/6f2268bd1d3d3ebaabb04d6b5d099425-Abstract.html)
Supplement: Supplementary file [file 6f2268bd1d3d3ebaabb04d6b5d099425-Supplemental.zip]

## A Experimental Setup

### A.1 Datasets

For our experimental analysis, we use the CIFAR-10 [Kri09] and ImageNet [Rus+15] datasets. Since obtaining a robust classifier for the full ImageNet dataset is known to be a challenging and computationally expensive problem, we also conduct experiments on a “restricted” version of the ImageNet dataset with 9 super-classes shown in Table 2. For image translation we use the Horse  $\leftrightarrow$  Zebra, Apple  $\leftrightarrow$  Orange, and Summer  $\leftrightarrow$  Winter datasets [Zhu+17].

| Class     | Corresponding ImageNet Classes |
|-----------|--------------------------------|
| “Dog”     | 151 to 268                     |
| “Cat”     | 281 to 285                     |
| “Frog”    | 30 to 32                       |
| “Turtle”  | 33 to 37                       |
| “Bird”    | 80 to 100                      |
| “Primate” | 365 to 382                     |
| “Fish”    | 389 to 397                     |
| “Crab”    | 118 to 121                     |
| “Insect”  | 300 to 319                     |

Table 2: Classes used in the Restricted ImageNet model. The class ranges are inclusive.

### A.2 Models

We use the standard ResNet-50 architecture [He+16] for our adversarially trained classifiers on all datasets. Every model is trained with data augmentation, momentum of 0.9 and weight decay of  $5e^{-4}$ . Other hyperparameters are provided in Tables 3 and 4.

| Dataset                         | Epochs | LR   | Batch Size | LR Schedule                           |
|---------------------------------|--------|------|------------|---------------------------------------|
| CIFAR-10                        | 350    | 0.01 | 256        | Drop by 10 at epochs $\in [150, 250]$ |
| restricted ImageNet             | 110    | 0.1  | 128        | Drop by 10 at epochs $\in [30, 60]$   |
| ImageNet                        | 110    | 0.1  | 256        | Drop by 10 at epochs $\in [100]$      |
| Horse $\leftrightarrow$ Zebra   | 350    | 0.01 | 64         | Drop by 10 at epochs $\in [50, 100]$  |
| Apple $\leftrightarrow$ Orange  | 350    | 0.01 | 64         | Drop by 10 at epochs $\in [50, 100]$  |
| Summer $\leftrightarrow$ Winter | 350    | 0.01 | 64         | Drop by 10 at epochs $\in [50, 100]$  |

Table 3: Standard hyperparameters for the models trained in the main paper.

### A.3 Adversarial training

In all our experiments, we train robust classifiers by employing the adversarial training methodology [Mad+18] with an  $\ell_2$  perturbation set. The hyperparameters used for robust training of each of our models are provided in Table 4.

### A.4 Note on hyperparameter tuning

Note that we did not perform *any* hyperparameter tuning for the hyperparameters in Table 3 because of computational constraints. We use the relatively standard benchmark  $\epsilon$  of 0.5 for CIFAR-10—the rest of the values of  $\epsilon$  were chosen roughly by scaling this up by the appropriate constant (i.e. proportional to  $\sqrt{\text{d}}$ )—we note that the networks are not critically sensitive to these values of epsilon (e.g. a CIFAR-10 model trained with  $\epsilon = 1.0$  gives almost the exact same results). Due to restrictions on compute we did not grid search over  $\epsilon$ , but finding a more direct manner in which to set  $\epsilon$  (e.g. via a desired adversarial accuracy) is an interesting future direction.

| Dataset                         | $\epsilon$ | # steps | Step size |
|---------------------------------|------------|---------|-----------|
| CIFAR-10                        | 0.5        | 7       | 0.1       |
| restricted ImageNet             | 3.5        | 7       | 0.1       |
| ImageNet                        | 3          | 7       | 0.5       |
| Horse $\leftrightarrow$ Zebra   | 5          | 7       | 0.9       |
| Apple $\leftrightarrow$ Orange  | 5          | 7       | 0.9       |
| Summer $\leftrightarrow$ Winter | 5          | 7       | 0.9       |

Table 4: Hyperparameters used for adversarial training.

#### A.5 Targeted Attacks in Figure 2

| Dataset             | $\epsilon$ | # steps | Step size |
|---------------------|------------|---------|-----------|
| restricted ImageNet | 300        | 500     | 1         |

#### A.6 Image-to-image translation

| Dataset                         | $\epsilon$ | # steps | Step size |
|---------------------------------|------------|---------|-----------|
| ImageNet                        | 60         | 80      | 1         |
| Horse $\leftrightarrow$ Zebra   | 60         | 80      | 0.5       |
| Apple $\leftrightarrow$ Orange  | 60         | 80      | 0.5       |
| Summer $\leftrightarrow$ Winter | 60         | 80      | 0.5       |

#### A.7 Generation

In order to compute the class conditional Gaussians for high resolution images ( $224 \times 224 \times 3$ ) we downsample the images by a factor of 4 and upsample the resulting seed images with nearest neighbor interpolation.

| Dataset             | $\epsilon$ | # steps | Step size |
|---------------------|------------|---------|-----------|
| CIFAR-10            | 30         | 60      | 0.5       |
| restricted ImageNet | 40         | 60      | 1         |
| ImageNet            | 40         | 60      | 1         |

##### A.7.1 Inception Score

Inception score is computed based on 50k class-balanced samples from each dataset using code provided in <https://github.com/ajbrock/BigGAN-PyTorch>.

#### A.8 Inpainting

To create a corrupted image, we select a patch of a given size at a random location in the image. We reset all pixel values in the patch to be the average pixel value over the entire image (per channel).

| Dataset             | patch size | $\epsilon$ | # steps | Step size |
|---------------------|------------|------------|---------|-----------|
| restricted ImageNet | 60         | 21         | 0.1     | 720       |

## A.9 Super-resolution

| Dataset             | $\uparrow$ factor | $\epsilon$ | # steps | Step size |
|---------------------|-------------------|------------|---------|-----------|
| CIFAR-10            | 7                 | 15         | 1       | 50        |
| restricted ImageNet | 8                 | 8          | 1       | 40        |

## B Omitted Figures

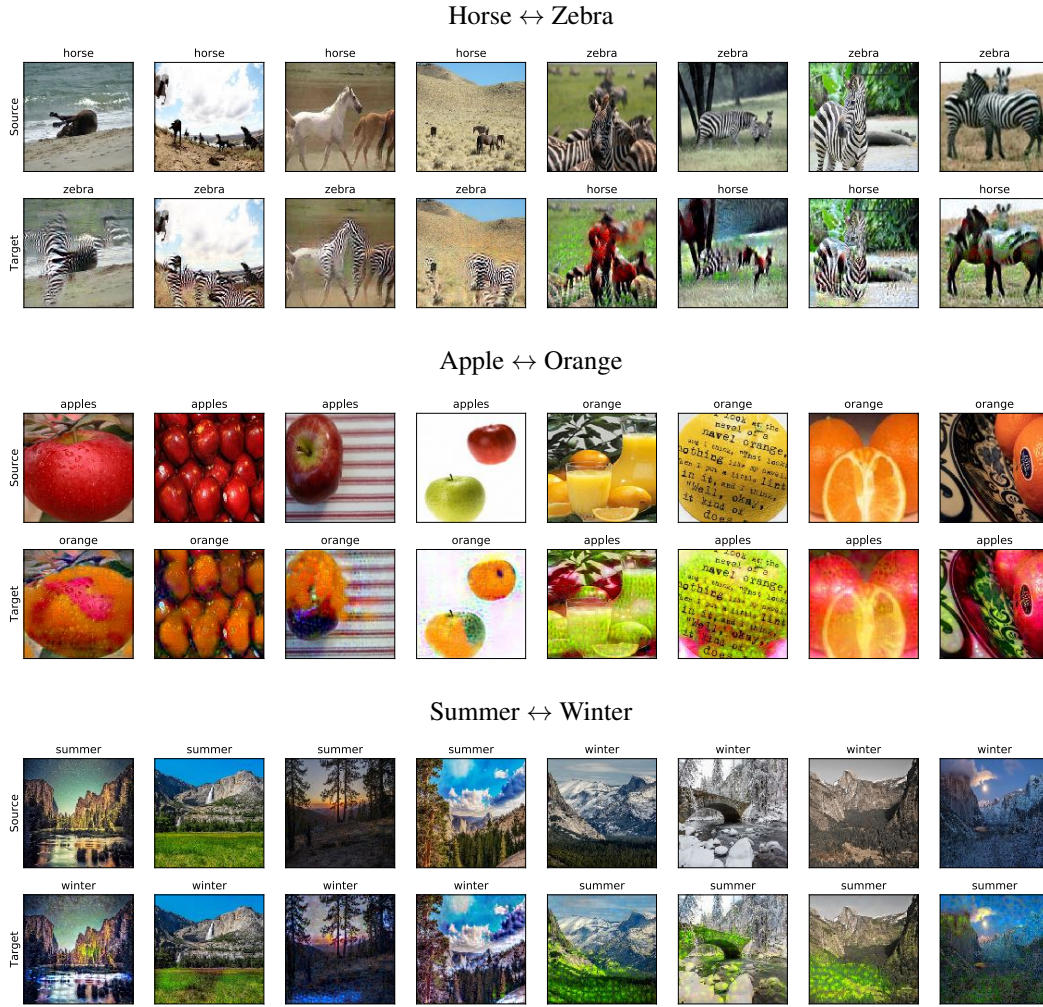

Figure 9: Random samples for image-to-image translation on the Horse  $\leftrightarrow$  Zebra, Apple  $\leftrightarrow$  Orange, and Summer  $\leftrightarrow$  Winter datasets [Zhu+17]. Details in Appendix A.

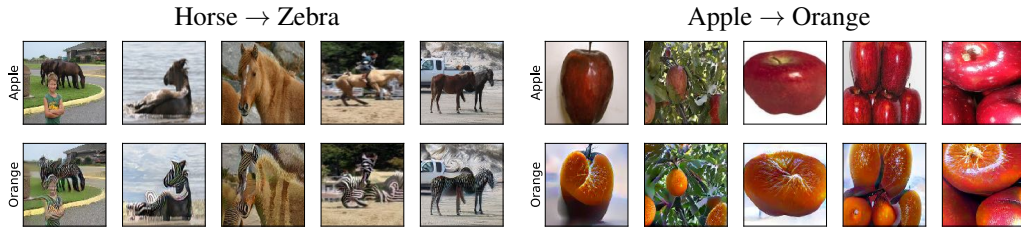

Figure 10: Random samples for image-to-image translation on the Horse  $\leftrightarrow$  Zebra and Apple  $\leftrightarrow$  Orange datasets [Zhu+17] using the *same* robust model trained on the *entire* ImageNet dataset. Here we use ImageNet classes “zebra” (340) and “orange” (950).

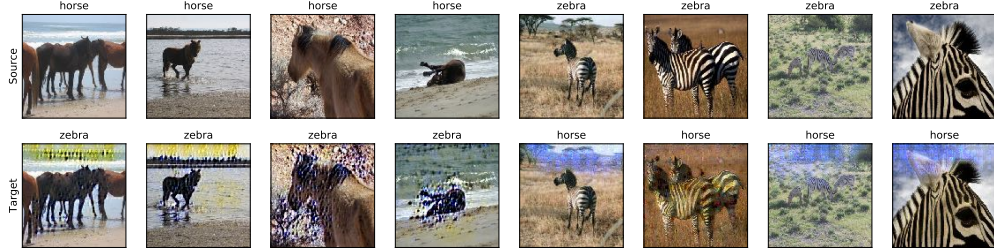

Figure 11: Training an  $\ell_\infty$ -robust model on the Horse  $\leftrightarrow$  Zebra dataset does not lead to plausible image-to-image translation. The model appears to associate “horse” with “blue sky” in which case the zebra to horse translation does not behave as expected.

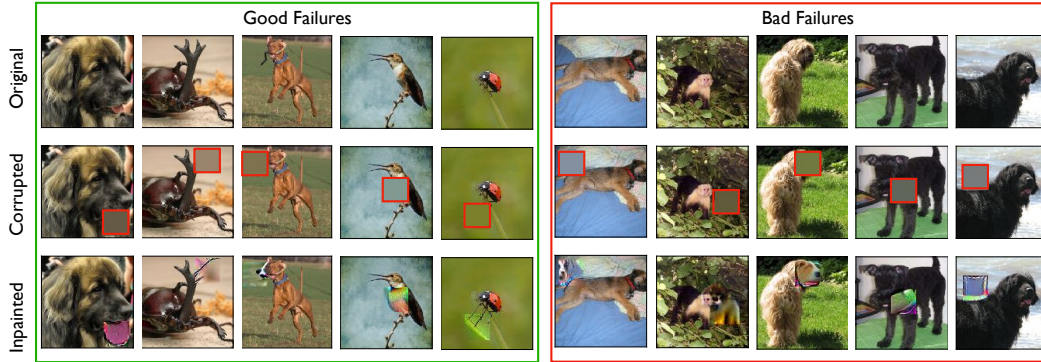

Figure 12: Failure cases for image inpainting using robust models – *top*: original, *middle*: corrupted and *bottom*: inpainted samples. To recover missing regions, we use PGD to maximise the class score of the image under a robust model while penalizing changes to the uncorrupted regions. The failure modes can be categorized into “good” failures – where the infilled region is semantically consistent with the rest of the image but differs from the original; and “bad” failures – where the inpainting is clearly erroneous to a human.



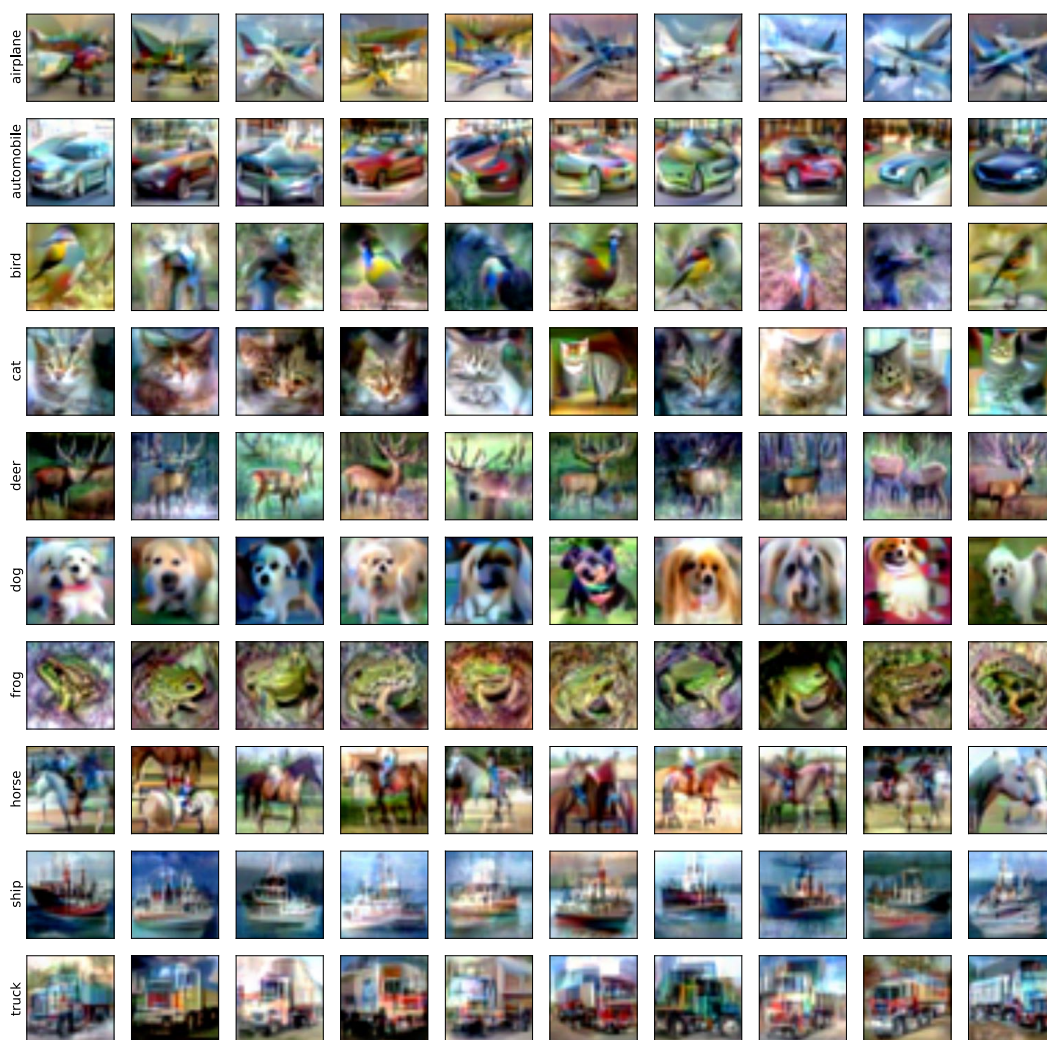

Figure 13: Random samples generated for the CIFAR dataset.

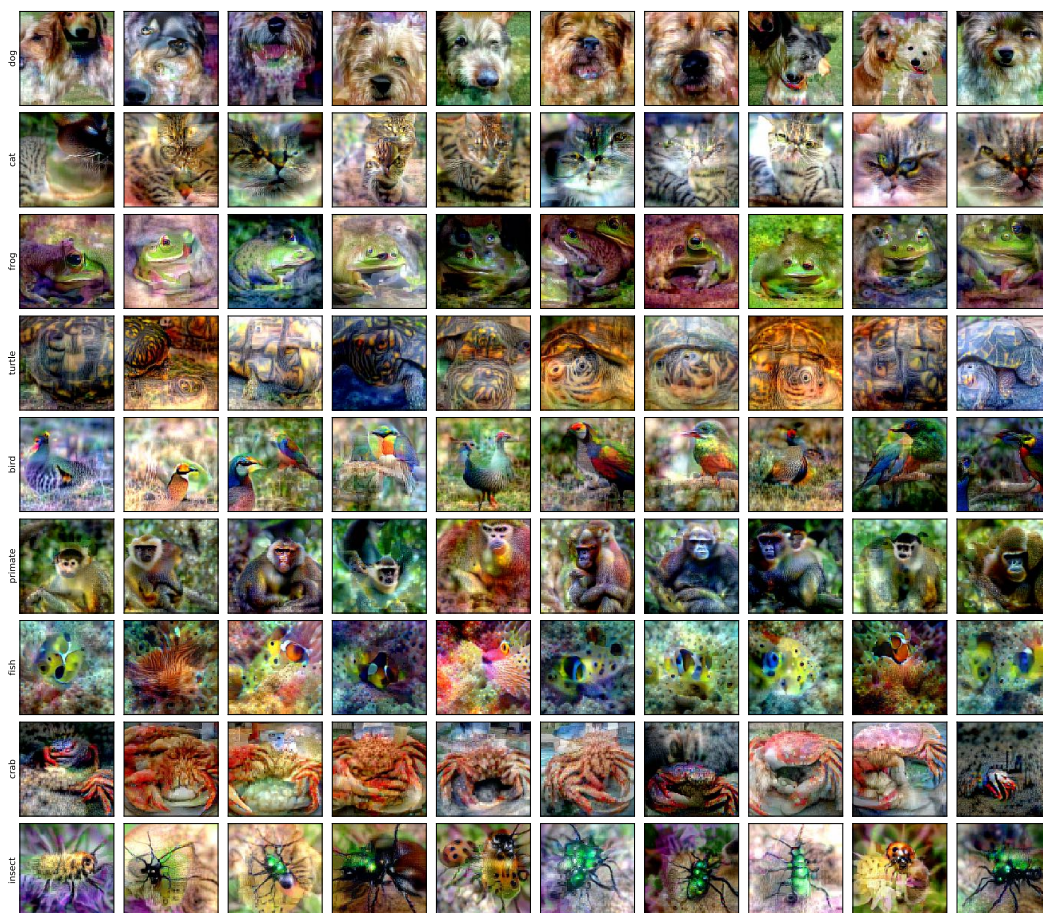

Figure 14: Random samples generated for the Restricted ImageNet dataset.



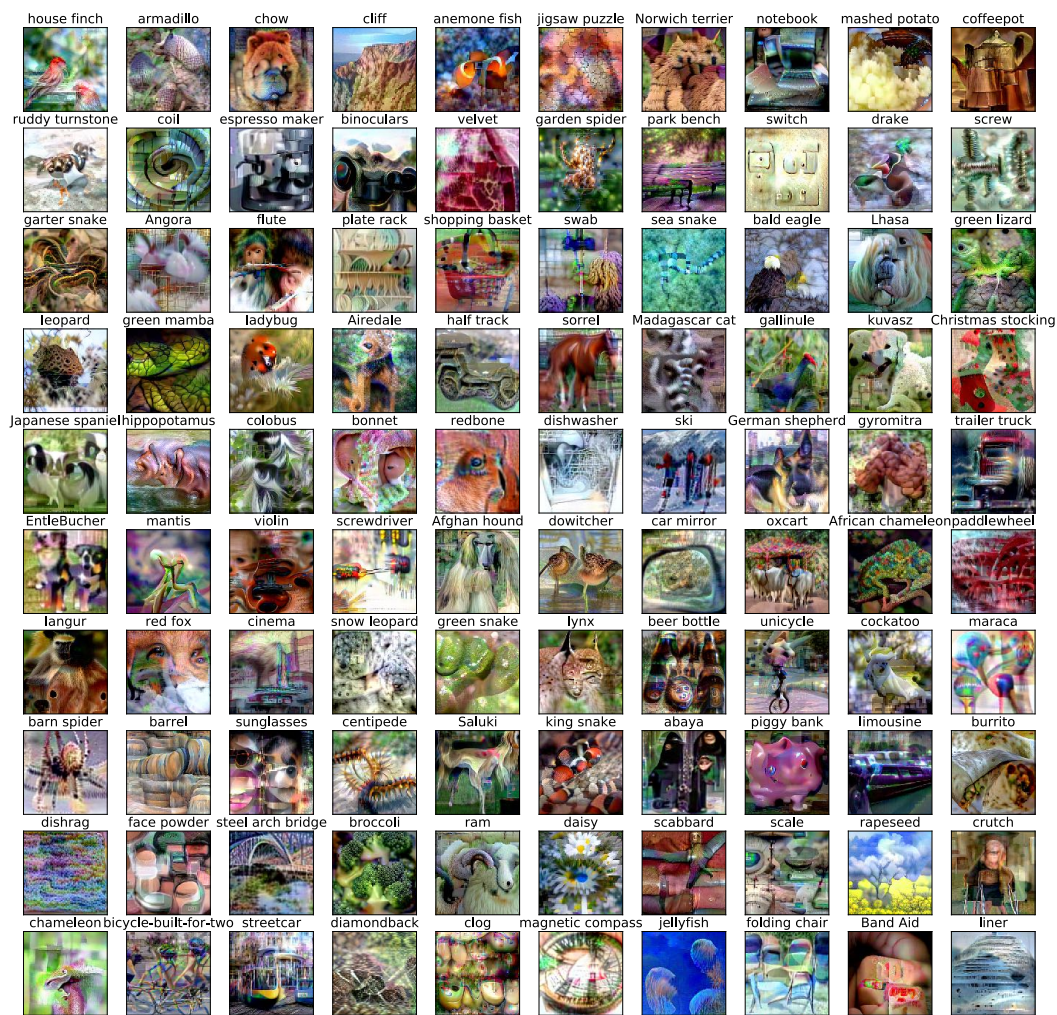

Figure 15: Random samples generated for the ImageNet dataset.



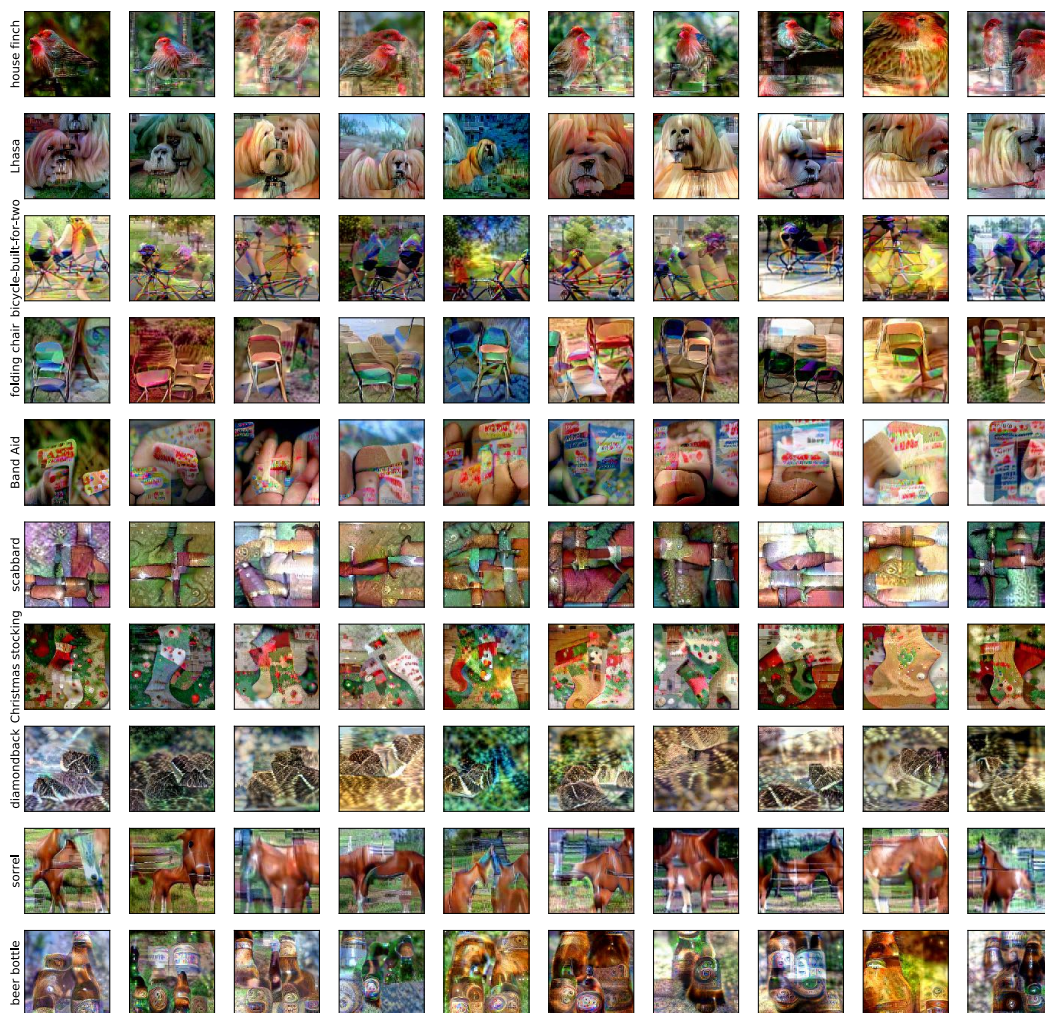

Figure 16: Random samples from a random class subset.

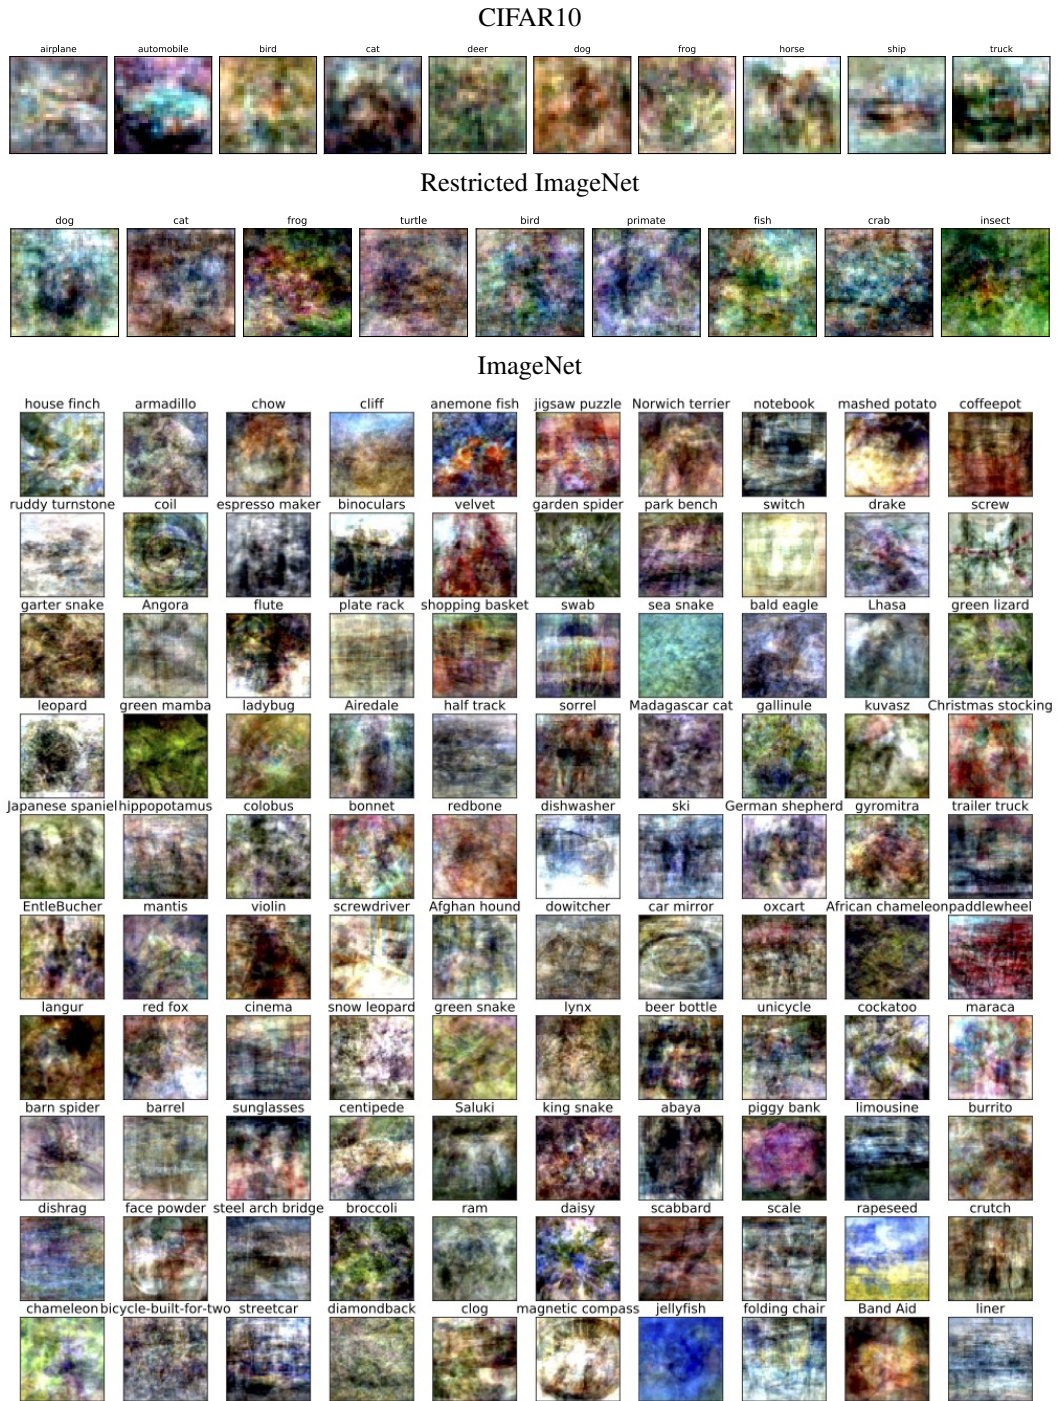

Figure 17: Samples from class-conditional multivariate normal distributions used as a seed for the generation process.
